# Supplementary material
Source: publisher figshare collection journal article supplement (https://acs.figshare.com/ndownloader/files/14994044)
Supplement: Supplementary file 1 [file 14994044]

**Table S1.** Dendrogram raw input data. Encapsulation efficiencies (EE) are formatted as fractions.

| Formulation             | FR (2h) | FR (24h) | d2-d7 slope | EE    | zeta potential | diameter | PDI        | DOP   | Mn    | Tm (Drug) | water solubility |
|-------------------------|---------|----------|-------------|-------|----------------|----------|------------|-------|-------|-----------|------------------|
| 20:80 CPH-SA 5% DOX     | 0.878   | 0.921    | 3.11275E-05 | 0.649 | -24.2          | 295.0    | 0.11606438 | 29.34 | 15385 | 201       | 630              |
| 20:80 CPH-SA 10% DOX    | 0.878   | 0.928    | 0.000682253 | 0.451 | -19.9          | 290.2    | 0.0944491  | 29.34 | 15385 | 201       | 630              |
| 20:80 CPTEG-CPH 5% DOX  | 0.810   | 0.816    | 0           | 0.663 | 16.1           | 187.0    | 0.13094153 | 16.69 | 5902  | 201       | 630              |
| 20:80 CPTEG-CPH 10% DOX | 0.861   | 0.871    | 0.000267517 | 0.519 | 10.8           | 198.0    | 0.09410895 | 16.69 | 5902  | 201       | 630              |
| 20:80 CPH-SA 5% DOX     | 0.821   | 0.882    | 0.001030157 | 0.493 | -24.2          | 295.0    | 0.11606438 | 29.34 | 15385 | 201       | 630              |
| 20:80 CPH-SA 10% DOX    | 0.870   | 0.926    | 0.000255865 | 0.349 | -19.9          | 290.2    | 0.0944491  | 29.34 | 15385 | 201       | 630              |
| 20:80 CPTEG-CPH 5% DOX  | 0.752   | 0.778    | 0.000964581 | 0.589 | -14            | 188.8    | 0.11068015 | 16.69 | 5902  | 201       | 630              |
| 20:80 CPTEG-CPH 10% DOX | 0.798   | 0.827    | 0.000407385 | 0.415 | 10.8           | 198.0    | 0.09410895 | 16.69 | 5902  | 201       | 630              |
| 20:80 CPH-SA 5% RIF     | 0.355   | 0.669    | 0.019842283 | 0.267 | -21.2          | 326.8    | 0.12999352 | 29.34 | 15385 | 183       | 1400             |
| 20:80 CPTEG-CPH 5% RIF  | 0.622   | 0.762    | 0.014603834 | 0.613 | -32.4          | 183.3    | 0.1262826  | 16.69 | 5902  | 183       | 1400             |
| 20:80 CPH-SA 5% RIF     | 0.315   | 0.721    | 0.019558135 | 0.385 | -21.2          | 326.8    | 0.12999352 | 29.34 | 15385 | 183       | 1400             |
| 20:80 CPTEG-CPH 5% RIF  | 0.665   | 0.855    | 0.005726169 | 1.127 | -13.9          | 164.8    | 0.10765556 | 16.69 | 5902  | 183       | 1400             |
| 20:80 CPH-SA 20% CAM    | 0.866   | 0.907    | 0.002788729 | 0.654 | -28.8          | 330.1    | 0.09645677 | 29.34 | 15385 | 171       | 2500             |
| 20:80 CPTEG-CPH 20% CAM | 0.766   | 0.782    | 0.000547523 | 1.235 | -36.5          | 177.3    | 0.10820173 | 16.69 | 5902  | 171       | 2500             |
| 20:80 CPTEG-CPH 20% CAM | 0.821   | 0.838    | 0.000423089 | 1.117 | -36.5          | 177.3    | 0.10820173 | 16.69 | 5902  | 171       | 2500             |
| 20:80 CPH-SA 20% CAM    | 0.886   | 0.927    | 0.001916802 | 0.598 | -28.8          | 330.1    | 0.09645677 | 29.34 | 15385 | 171       | 2500             |
| 20:80 CPH-SA 5% PZA     | 0.171   | 0.276    | 0.021718991 | 0.493 | -21.5          | 282.3    | 0.11965848 | 29.34 | 15385 | 192       | 1.50E+04         |
| 20:80 CPTEG-CPH 5% PZA  | 0.057   | 0.086    | 0.008793703 | 0.897 | -24.1          | 216.3    | 0.10769206 | 16.69 | 5902  | 192       | 1.50E+04         |
| 20:80 CPH-SA 5% PZA     | 0.298   | 0.449    | 0.021676638 | 0.349 | -32.8          | 317.7    | 0.09466064 | 29.34 | 15385 | 192       | 1.50E+04         |
| 20:80 CPTEG-CPH 5% PZA  | 0.268   | 0.313    | 0.006047673 | 1.169 | -35.1          | 181.5    | 0.12303395 | 18.47 | 6499  | 192       | 1.50E+04         |
| 20:80 CPH-SA 10% DOX    | 0.843   | 0.856    | 0.01784599  | 0.410 | -16.4          | 300.1    | 0.14238195 | 66.18 | 14715 | 201       | 630              |
| 20:80 CPH-SA 9% DOX     | 0.876   | 0.885    | 0.014484272 | 0.516 | -10.4          | 302.3    | 0.15598785 | 66.18 | 14715 | 201       | 630              |
| 20:80 CPH-SA 8% DOX     | 0.785   | 0.822    | 0.017440928 | 0.656 | -7.46          | 329.0    | 0.13393998 | 66.18 | 14715 | 201       | 630              |
| 20:80 CPH-SA 7% DOX     | 0.823   | 0.860    | 0.01375275  | 0.686 | -19.3          | 352.0    | 0.1488103  | 66.18 | 14715 | 201       | 630              |
| 20:80 CPH-SA 6% DOX     | 0.829   | 0.855    | 0.015909071 | 0.768 | -14.7          | 343.2    | 0.14415255 | 66.18 | 14715 | 201       | 630              |
| 20:80 CPH-SA 5% DOX     | 0.865   | 0.882    | 0.014097678 | 0.895 | -20.1          | 346.3    | 0.14633586 | 66.18 | 14715 | 201       | 630              |
| 20:80 CPH-SA 4% DOX     | 0.763   | 0.795    | 0.022073666 | 0.876 | -13.6          | 337.2    | 0.15620233 | 66.18 | 14715 | 201       | 630              |
| 20:80 CPH-SA 3% DOX     | 0.785   | 0.807    | 0.021288819 | 1.074 | -17            | 344.8    | 0.14393289 | 66.18 | 14715 | 201       | 630              |
| 20:80 CPH-SA 2% DOX     | 0.764   | 0.792    | 0.022058247 | 1.305 | -18.9          | 342.4    | 0.14448117 | 66.18 | 14715 | 201       | 630              |
| 20:80 CPH-SA 1% DOX     | 0.675   | 0.702    | 0.029634541 | 1.590 | -7.96          | 324.5    | 0.14340887 | 66.18 | 14715 | 201       | 630              |
| 20:80 CPTEG-CPH 10% DOX | 0.799   | 0.905    | 0.000223847 | 0.574 | -8.24          | 188.8    | 0.08952265 | 17.71 | 6230  | 201       | 630              |
| 20:80 CPTEG-CPH 9% DOX  | 0.836   | 0.900    | 0           | 0.647 | -2.23          | 175.3    | 0.11657572 | 17.71 | 6230  | 201       | 630              |
| 20:80 CPTEG-CPH 8% DOX  | 0.823   | 0.878    | 0.000418826 | 0.488 | -6.01          | 163.3    | 0.10179907 | 17.71 | 6230  | 201       | 630              |
| 20:80 CPTEG-CPH 7% DOX  | 0.760   | 0.833    | 0.001562307 | 0.642 | -6.12          | 165.0    | 0.10244058 | 17.71 | 6230  | 201       | 630              |
| 20:80 CPTEG-CPH 6% DOX  | 0.656   | 0.731    | 0.001318373 | 0.714 | -3.44          | 177.3    | 0.09540602 | 17.71 | 6230  | 201       | 630              |
| 20:80 CPTEG-CPH 5% DOX  | 0.736   | 0.794    | 0.000230922 | 0.583 | -5.95          | 167.3    | 0.09709577 | 17.71 | 6230  | 201       | 630              |
| 20:80 CPTEG-CPH 4% DOX  | 0.709   | 0.777    | 0.000136467 | 0.636 | -7.1           | 163.3    | 0.08765737 | 17.71 | 6230  | 201       | 630              |
| 20:80 CPTEG-CPH 3% DOX  | 0.546   | 0.646    | 0           | 0.524 | -6.21          | 157.5    | 0.0797639  | 17.71 | 6230  | 201       | 630              |
| 20:80 CPTEG-CPH 2% DOX  | 0.422   | 0.558    | 0.001648516 | 0.463 | -13.6          | 157.5    | 0.08989265 | 17.71 | 6230  | 201       | 630              |
| 20:80 CPTEG-CPH 1% DOX  | 0.329   | 0.462    | 0.000816278 | 0.716 | -6.24          | 171.3    | 0.10018658 | 17.71 | 6230  | 201       | 630              |
| 20:80 CPH-SA 10% RIF    | 0.410   | 0.574    | 0.048640198 | 0.196 | -17.3          | 298.3    | 0.12142294 | 66.18 | 14715 | 183       | 1400             |
| 20:80 CPH-SA 9% RIF     | 0.417   | 0.620    | 0.039920326 | 0.207 | -17.4          | 329.0    | 0.15660778 | 66.18 | 14715 | 183       | 1400             |
| 20:80 CPH-SA 8% RIF     | 0.327   | 0.420    | 0.067948568 | 0.176 | -23.3          | 351.9    | 0.1414808  | 66.18 | 14715 | 183       | 1400             |
| 20:80 CPH-SA 7% RIF     | 0.412   | 0.616    | 0.039087381 | 0.255 | -16.9          | 352.6    | 0.15262713 | 66.18 | 14715 | 183       | 1400             |
| 20:80 CPH-SA 6% RIF     | 0.332   | 0.418    | 0.068454099 | 0.207 | -18.1          | 345.2    | 0.12222125 | 66.18 | 14715 | 183       | 1400             |
| 20:80 CPH-SA 5% RIF     | 0.345   | 0.446    | 0.066219621 | 0.230 | -24.3          | 350.0    | 0.13065327 | 66.18 | 14715 | 183       | 1400             |
| 20:80 CPH-SA 4% RIF     | 0.274   | 0.347    | 0.062373003 | 0.245 | -17.3          | 359.5    | 0.13344125 | 66.18 | 14715 | 183       | 1400             |
| 20:80 CPH-SA 3% RIF     | 0.240   | 0.335    | 0.069931327 | 0.298 | -20.6          | 366.7    | 0.12454902 | 66.18 | 14715 | 183       | 1400             |
| 20:80 CPH-SA 2% RIF     | 0.186   | 0.255    | 0.05983363  | 0.305 | -24.4          | 317.3    | 0.13607798 | 66.18 | 14715 | 183       | 1400             |
| 20:80 CPH-SA 1% RIF     | 0.106   | 0.168    | 0.062846415 | 0.493 | -23.1          | 338.3    | 0.15404764 | 66.18 | 14715 | 183       | 1400             |
| 20:80 CPTEG-CPH 10% RIF | 0.556   | 0.709    | 0.011641771 | 1.017 | -15.3          | 171.8    | 0.0920574  | 17.71 | 6230  | 183       | 1400             |
| 20:80 CPTEG-CPH 9% RIF  | 0.520   | 0.670    | 0.013749282 | 0.883 | -19.5          | 173.9    | 0.09072136 | 17.71 | 6230  | 183       | 1400             |
| 20:80 CPTEG-CPH 8% RIF  | 0.585   | 0.721    | 0.017676351 | 1.161 | -9.86          | 161.8    | 0.08304844 | 17.71 | 6230  | 183       | 1400             |
| 20:80 CPTEG-CPH 7% RIF  | 0.442   | 0.665    | 0.018013083 | 0.946 | -24.5          | 168.5    | 0.11797225 | 17.71 | 6230  | 183       | 1400             |
| 20:80 CPTEG-CPH 6% RIF  | 0.427   | 0.621    | 0.021899935 | 1.155 | -37.1          | 164.5    | 0.08225642 | 17.71 | 6230  | 183       | 1400             |
| 20:80 CPTEG-CPH 5% RIF  | 0.394   | 0.650    | 0.023027263 | 1.268 | -21.8          | 168.0    | 0.08104582 | 17.71 | 6230  | 183       | 1400             |
| 20:80 CPTEG-CPH 4% RIF  | 0.580   | 0.704    | 0.011808479 | 1.175 | -23.3          | 172.0    | 0.10299328 | 17.11 | 6052  | 183       | 1400             |
| 20:80 CPTEG-CPH 3% RIF  | 0.454   | 0.755    | 0.01425443  | 1.787 | -25.8          | 169.5    | 0.09688981 | 17.71 | 6230  | 183       | 1400             |
| 20:80 CPTEG-CPH 2% RIF  | 0.420   | 0.769    | 0.014252747 | 2.503 | -22.1          | 165.8    | 0.09975738 | 17.71 | 6230  | 183       | 1400             |
| 20:80 CPTEG-CPH 1% RIF  | 0.260   | 0.733    | 0.003109203 | 1.837 | -27.3          | 174.5    | 0.09653278 | 17.71 | 6230  | 183       | 1400             |
| 10:90 CPTEG-CPH 10% RIF | 0.533   | 0.734    | 0.02296554  | 0.991 | -7.27          | 175.5    | 0.12154016 | 19.7  | 6894  | 183       | 1400             |
| 20:80 CPTEG-CPH 10% RIF | 0.630   | 0.760    | 0.017949702 | 1.108 | -1.56          | 162.8    | 0.10197021 | 17.67 | 6225  | 183       | 1400             |
| 30:70 CPTEG-CPH 10% RIF | 0.715   | 0.819    | 0.006303884 | 0.940 | -7.59          | 172.0    | 0.10670578 | 20.97 | 7412  | 183       | 1400             |
| 50:50 CPTEG-CPH 10% RIF | 0.818   | 0.872    | 0.00086837  | 0.867 | -13.1          | 160.3    | 0.08394513 | 16.89 | 6099  | 183       | 1400             |
| 10:90 CPTEG-CPH 10% RIF | 0.547   | 0.733    | 0.014208586 | 1.177 | -13.1          | 178.8    | 0.09274206 | 19.7  | 6894  | 183       | 1400             |
| 20:80 CPTEG-CPH 10% RIF | 0.616   | 0.744    | 0.00785114  | 1.196 | -15.5          | 175.3    | 0.09939584 | 17.67 | 6225  | 183       | 1400             |
| 30:70 CPTEG-CPH 10% RIF | 0.698   | 0.809    | 0.005925504 | 1.222 | -9.16          | 181.3    | 0.12844245 | 20.97 | 7412  | 183       | 1400             |
| 50:50 CPTEG-CPH 10% RIF | 0.785   | 0.857    | 0.001769323 | 1.058 | -18.2          | 177.0    | 0.09931877 | 16.89 | 6099  | 183       | 1400             |

**Table S2.** Dendrogram processed input data. The data were normalized and mean-centered.

| Formulation             | FR (2h) | FR (24h) | d2-d7 slope | EE     | zeta potential | diameter | PDI        | DOP   | Mn    | Tm (Drug) | water solubility |
|-------------------------|---------|----------|-------------|--------|----------------|----------|------------|-------|-------|-----------|------------------|
| 20:80 CPH-SA 5% DOX     | 1.049   | 0.957    | -0.77245373 | -0.269 | -0.695637879   | 0.8      | 0.11000297 | -0.12 | 1.329 | 1.167277  | -0.241625119     |
| 20:80 CPH-SA 10% DOX    | 1.049   | 0.990    | -0.73878824 | -0.731 | -0.27866345    | 0.7      | -0.9161651 | -0.12 | 1.329 | 1.167277  | -0.241625119     |
| 20:80 CPTEG:CPH 5% DOX  | 0.771   | 0.464    | -0.77406313 | -0.236 | 3.212285262    | -0.6     | 0.81628394 | -0.73 | -0.87 | 1.167277  | -0.241625119     |
| 20:80 CPTEG:CPH 10% DOX | 0.978   | 0.722    | -0.76023157 | -0.572 | 2.698340035    | -0.5     | -0.9323134 | -0.73 | -0.87 | 1.167277  | -0.241625119     |
| 20:80 CPH-SA 5% DOX     | 0.818   | 0.773    | -0.7208004  | -0.631 | -0.695637879   | 0.8      | 0.11000297 | -0.12 | 1.329 | 1.167277  | -0.241625119     |
| 20:80 CPH-SA 10% DOX    | 1.017   | 0.982    | -0.76083402 | -0.967 | -0.27866345    | 0.7      | -0.9161651 | -0.12 | 1.329 | 1.167277  | -0.241625119     |
| 20:80 CPTEG:CPH 5% DOX  | 0.537   | 0.285    | -0.7241909  | -0.408 | 2.93464256     | -0.6     | -0.145609  | -0.73 | -0.87 | 1.167277  | -0.241625119     |
| 20:80 CPTEG:CPH 10% DOX | 0.725   | 0.516    | -0.75299988 | -0.815 | 2.698340035    | -0.5     | -0.9323134 | -0.73 | -0.87 | 1.167277  | -0.241625119     |
| 20:80 CPH-SA 5% RIF     | -1.074  | -0.231   | 0.251852237 | -1.159 | -0.404725487   | 1.2      | 0.77127795 | -0.12 | 1.329 | -0.66354  | -0.207450955     |
| 20:80 CPTEG:CPH 5% RIF  | 0.009   | 0.208    | -0.01899388 | -0.353 | -1.490798419   | -0.7     | 0.59510478 | -0.73 | -0.87 | -0.66354  | -0.207450955     |
| 20:80 CPH-SA 5% RIF     | -1.239  | 0.014    | 0.237160814 | -0.884 | -0.404725487   | 1.2      | 0.77127795 | -0.12 | 1.329 | -0.66354  | -0.207450955     |
| 20:80 CPTEG:CPH 5% RIF  | 0.182   | 0.647    | -0.47800015 | 0.846  | 0.303161336    | -0.9     | -0.289199  | -0.73 | -0.87 | -0.66354  | -0.207450955     |
| 20:80 CPH-SA 20% CAM    | 1.001   | 0.891    | -0.62987609 | ####   | -1.141703548   | 1.2      | -0.8208524 | -0.12 | 1.329 | -1.88408  | -0.158630722     |
| 20:80 CPTEG:CPH 20% CAM | 0.593   | 0.301    | -0.74575429 | 1.099  | -1.888378689   | -0.8     | -0.2632698 | -0.73 | -0.87 | -1.88408  | -0.158630722     |
| 20:80 CPTEG:CPH 20% CAM | 0.818   | 0.567    | -0.75218793 | 0.823  | -1.888378689   | -0.8     | -0.2632698 | -0.73 | -0.87 | -1.88408  | -0.158630722     |
| 20:80 CPH-SA 20% CAM    | 1.082   | 0.987    | -0.67495776 | -0.388 | -1.141703548   | 1.2      | -0.8208524 | -0.12 | 1.329 | -1.88408  | -0.158630722     |
| 20:80 CPH-SA 5% PZA     | -1.821  | -2.087   | 0.348884598 | -0.631 | -0.433816726   | 0.6      | 0.28063019 | -0.12 | 1.329 | 0.251871  | 3.96E-01         |
| 20:80 CPTEG:CPH 5% PZA  | -2.284  | -2.983   | -0.31939797 | 0.309  | -0.6859408     | -0.3     | -0.2874662 | -0.73 | -0.87 | 0.251871  | 3.96E-01         |
| 20:80 CPH-SA 5% PZA     | -1.308  | -1.270   | 0.346694823 | -0.969 | -1.529586738   | 1.1      | -0.9061224 | -0.12 | 1.329 | 0.251871  | 3.96E-01         |
| 20:80 CPTEG:CPH 5% PZA  | -1.427  | -1.912   | -0.46137727 | 0.943  | -1.752619573   | -0.7     | 0.44087769 | -0.64 | -0.73 | 0.251871  | 3.96E-01         |
| 20:80 CPH-SA 10% DOX    | 0.907   | 0.653    | 0.148636914 | -0.826 | 0.060734342    | 0.8      | 1.35940872 | 1.632 | 1.174 | 1.167277  | -0.241625119     |
| 20:80 CPH-SA 9% DOX     | 1.041   | 0.787    | -0.02517562 | -0.580 | 0.642559127    | 0.9      | 2.00533759 | 1.632 | 1.174 | 1.167277  | -0.241625119     |
| 20:80 CPH-SA 8% DOX     | 0.671   | 0.490    | 0.127693791 | -0.252 | 0.927653272    | 1.2      | 0.95863291 | 1.632 | 1.174 | 1.167277  | -0.241625119     |
| 20:80 CPH-SA 7% DOX     | 0.823   | 0.671    | -0.06299788 | -0.182 | -0.220480971   | 1.5      | 1.66458911 | 1.632 | 1.174 | 1.167277  | -0.241625119     |
| 20:80 CPTEG:CPH 7% DOX  | 0.848   | 0.647    | 0.048491452 | 0.008  | 0.225584697    | 1.4      | 1.44346644 | 1.632 | 1.174 | 1.167277  | -0.241625119     |
| 20:80 CPH-SA 5% DOX     | 0.997   | 0.773    | -0.04516392 | 0.304  | -0.298057609   | 1.4      | 1.54711713 | 1.632 | 1.174 | 1.167277  | -0.241625119     |
| 20:80 CPH-SA 4% DOX     | 0.583   | 0.365    | 0.367222585 | 0.261  | 0.332252575    | 1.3      | 2.01552003 | 1.632 | 1.174 | 1.167277  | -0.241625119     |
| 20:80 CPH-SA 3% DOX     | 0.671   | 0.420    | 0.326643234 | 0.723  | 0.002551863    | 1.4      | 1.43303826 | 1.632 | 1.174 | 1.167277  | -0.241625119     |
| 20:80 CPH-SA 2% DOX     | 0.585   | 0.349    | 0.366425325 | 1.260  | -0.181692652   | 1.4      | 1.45906738 | 1.632 | 1.174 | 1.167277  | -0.241625119     |
| 20:80 CPH-SA 1% DOX     | 0.224   | -0.077   | 0.758146213 | 1.925  | 0.879167873    | 1.2      | 1.40816087 | 1.632 | 1.174 | 1.167277  | -0.241625119     |
| 20:80 CPTEG:CPH 10% DOX | 0.726   | 0.883    | -0.76248944 | -0.443 | 0.85201605     | -0.6     | -1.1500441 | -0.68 | -0.8  | 1.167277  | -0.241625119     |
| 20:80 CPTEG:CPH 9% DOX  | 0.878   | 0.858    | -0.77406313 | -0.272 | 1.434810543    | -0.8     | 0.13427868 | -0.68 | -0.8  | 1.167277  | -0.241625119     |
| 20:80 CPTEG:CPH 8% DOX  | 0.826   | 0.757    | -0.75240837 | -0.643 | 1.068360938    | -0.9     | -0.567231  | -0.68 | -0.8  | 1.167277  | -0.241625119     |
| 20:80 CPTEG:CPH 7% DOX  | 0.570   | 0.543    | -0.69328637 | -0.284 | 1.05759414     | -0.9     | -0.536776  | -0.68 | -0.8  | 1.167277  | -0.241625119     |
| 20:80 CPTEG:CPH 6% DOX  | 0.145   | 0.060    | -0.70589865 | -0.118 | 1.117475878    | -0.8     | -0.8707359 | -0.68 | -0.8  | 1.167277  | -0.241625119     |
| 20:80 CPTEG:CPH 5% DOX  | 0.470   | 0.357    | -0.76212366 | -0.422 | 1.074079176    | -0.9     | -0.7905163 | -0.68 | -0.8  | 1.167277  | -0.241625119     |
| 20:80 CPTEG:CPH 4% DOX  | 0.363   | 0.280    | -0.76700732 | -0.299 | 0.962562759    | -0.9     | -1.2385971 | -0.68 | -0.8  | 1.167277  | -0.241625119     |
| 20:80 CPTEG:CPH 3% DOX  | -0.301  | -0.340   | -0.77406313 | -0.560 | 1.048866769    | -1.0     | -1.6133331 | -0.68 | -0.8  | 1.167277  | -0.241625119     |
| 20:80 CPTEG:CPH 2% DOX  | -0.802  | -0.757   | -0.68882911 | -0.702 | 0.332252575    | -1.0     | -1.1324789 | -0.68 | -0.8  | 1.167277  | -0.241625119     |
| 20:80 CPTEG:CPH 1% DOX  | -1.179  | -1.210   | -0.73185869 | -0.113 | 1.045957645    | -0.8     | -0.6437825 | -0.68 | -0.8  | 1.167277  | -0.241625119     |
| 20:80 CPH-SA 10% RIF    | -0.852  | -0.678   | 1.740805149 | -1.324 | -0.026539376   | 0.8      | 0.3643963  | 1.632 | 1.174 | -0.66354  | -0.207450955     |
| 20:80 CPH-SA 9% RIF     | -0.825  | -0.464   | 1.289957248 | -1.299 | -0.036236456   | 1.2      | 2.0347684  | 1.632 | 1.174 | -0.66354  | -0.207450955     |
| 20:80 CPH-SA 8% RIF     | -1.187  | -1.407   | 2.739115341 | -1.372 | -0.608364162   | 1.5      | 1.31662712 | 1.632 | 1.174 | -0.66354  | -0.207450955     |
| 20:80 CPH-SA 7% RIF     | -0.845  | -0.482   | 1.246891117 | -1.187 | 0.012248943    | 1.5      | 1.84579016 | 1.632 | 1.174 | -0.66354  | -0.207450955     |
| 20:80 CPH-SA 6% RIF     | -1.170  | -1.417   | 2.76525308  | -1.299 | -0.104116014   | 1.4      | 0.40229543 | 1.632 | 1.174 | -0.66354  | -0.207450955     |
| 20:80 CPH-SA 5% RIF     | -1.114  | -1.286   | 2.649722729 | -1.244 | -0.705334959   | 1.5      | 0.80229871 | 1.632 | 1.174 | -0.66354  | -0.207450955     |
| 20:80 CPH-SA 4% RIF     | -1.405  | -1.753   | 2.450839151 | -1.211 | -0.026539376   | 1.6      | 0.93495577 | 1.632 | 1.174 | -0.66354  | -0.207450955     |
| 20:80 CPH-SA 3% RIF     | -1.543  | -1.810   | 2.841627302 | -1.086 | -0.346543008   | 1.7      | 0.51280454 | 1.632 | 1.174 | -0.66354  | -0.207450955     |
| 20:80 CPH-SA 2% RIF     | -1.761  | -2.185   | 2.319544683 | -1.071 | -0.715032039   | 1.1      | 1.06013267 | 1.632 | 1.174 | -0.66354  | -0.207450955     |
| 20:80 CPH-SA 1% RIF     | -2.087  | -2.599   | 2.475316219 | -0.631 | -0.588970002   | 1.3      | 1.91322802 | 1.632 | 1.174 | -0.66354  | -0.207450955     |
| 20:80 CPTEG:CPH 10% RIF | -0.259  | -0.044   | -0.17214289 | 0.590  | 0.167402219    | -0.8     | -1.0297088 | -0.68 | -0.8  | -0.66354  | -0.207450955     |
| 20:80 CPTEG:CPH 9% RIF  | -0.407  | -0.227   | -0.06317719 | 0.277  | -0.239875131   | -0.8     | -1.0931363 | -0.68 | -0.8  | -0.66354  | -0.207450955     |
| 20:80 CPTEG:CPH 8% RIF  | -0.141  | 0.013    | 0.139866018 | 0.925  | 0.694923358    | -1.0     | -1.4574022 | -0.68 | -0.8  | -0.66354  | -0.207450955     |
| 20:80 CPTEG:CPH 7% RIF  | -0.721  | -0.252   | 0.157276246 | 0.423  | -0.724729119   | -0.9     | 0.20057743 | -0.68 | -0.8  | -0.66354  | -0.207450955     |
| 20:80 CPTEG:CPH 6% RIF  | -0.783  | -0.458   | 0.362893362 | 0.910  | -1.946561168   | -0.9     | -1.4950025 | -0.68 | -0.8  | -0.66354  | -0.207450955     |
| 20:80 CPTEG:CPH 5% RIF  | -0.917  | -0.321   | 0.416526836 | 1.174  | -0.462907965   | -0.9     | -1.552475  | -0.68 | -0.8  | -0.66354  | -0.207450955     |
| 20:80 CPTEG:CPH 4% RIF  | -0.163  | -0.066   | -0.16352351 | 0.958  | -0.608364162   | -0.8     | -0.5105371 | -0.71 | -0.84 | -0.66354  | -0.207450955     |
| 20:80 CPTEG:CPH 3% RIF  | -0.673  | 0.173    | -0.03705928 | 2.385  | -0.850791155   | -0.9     | -0.8002944 | -0.68 | -0.8  | -0.66354  | -0.207450955     |
| 20:80 CPTEG:CPH 2% RIF  | -0.811  | 0.242    | -0.03714627 | 4.054  | -0.491999204   | -0.9     | -0.6641587 | -0.68 | -0.8  | -0.66354  | -0.207450955     |
| 20:80 CPTEG:CPH 1% RIF  | -1.462  | 0.071    | -0.61330646 | 2.500  | -0.996247352   | -0.8     | -0.817244  | -0.68 | -0.8  | -0.66354  | -0.207450955     |
| 10:90 CPTEG:CPH 10% RIF | -0.351  | 0.074    | 0.413335551 | 0.529  | 0.946077723    | -0.8     | 0.36996134 | -0.58 | -0.64 | -0.66354  | -0.207450955     |
| 20:80 CPTEG:CPH 10% RIF | 0.040   | 0.200    | 0.153999224 | 0.802  | 1.499780977    | -0.9     | -0.5591065 | -0.68 | -0.8  | -0.66354  | -0.207450955     |
| 30:70 CPTEG:CPH 10% RIF | 0.388   | 0.475    | -0.4481303  | 0.410  | 0.915047068    | -0.8     | -0.3342888 | -0.52 | -0.52 | -0.66354  | -0.207450955     |
| 50:50 CPTEG:CPH 10% RIF | 0.806   | 0.726    | -0.72916535 | 0.240  | 0.380737974    | -1.0     | -1.4148327 | -0.72 | -0.83 | -0.66354  | -0.207450955     |
| 10:90 CPTEG:CPH 10% RIF | -0.294  | 0.069    | -0.03942957 | 0.962  | 0.380737974    | -0.7     | -0.9972053 | -0.58 | -0.64 | -0.66354  | -0.207450955     |
| 20:80 CPTEG:CPH 10% RIF | -0.016  | 0.123    | -0.36813176 | 1.007  | 0.148008059    | -0.8     | -0.6813224 | -0.68 | -0.8  | -0.66354  | -0.207450955     |
| 30:70 CPTEG:CPH 10% RIF | 0.317   | 0.430    | -0.46769388 | 1.067  | 0.762802916    | -0.7     | 0.69764198 | -0.52 | -0.52 | -0.66354  | -0.207450955     |
| 50:50 CPTEG:CPH 10% RIF | 0.669   | 0.656    | -0.68258294 | 0.684  | -0.113813094   | -0.8     | -0.6849813 | -0.72 | -0.83 | -0.66354  | -0.207450955     |

**Table S3.** Principal component analysis raw input data. Encapsulation efficiencies (EE) are formatted as fractions.

| Formulation            | Drug Release Properties |        |        | Particle Properties |               |             |                         |            |            |                 |                    |                   |           | Drug Chemistry |            |           |            |            |                    |         |                         |       |                      | Droplet Experimental Data |                      |                         |                      |                         |                      |              |                     |                 |  |
|------------------------|-------------------------|--------|--------|---------------------|---------------|-------------|-------------------------|------------|------------|-----------------|--------------------|-------------------|-----------|----------------|------------|-----------|------------|------------|--------------------|---------|-------------------------|-------|----------------------|---------------------------|----------------------|-------------------------|----------------------|-------------------------|----------------------|--------------|---------------------|-----------------|--|
|                        | EE (%)                  | FA (%) | FR (%) | zeta potential      | diameter (nm) | PDI         | Water Contact Angle (°) | DOP (nmol) | Mn (g/mol) | Xanthone (nmol) | Aliphatic C (nmol) | Aromatic C (nmol) | NC (nmol) | NH (nmol)      | NO (nmol)  | CN (nmol) | NH (nmol)  | NO (nmol)  | Molar mass (g/mol) | Tm (°C) | Water Solubility (mg/L) | logP  | pKa (strongest acid) | pKa (strongest base)      | physiological charge | hydrogen acceptor count | hydrogen donor count | polar surface area (Å²) | rotatable bond count | refractivity | polarizability (Å³) | number of rings |  |
|                        |                         |        |        |                     |               |             |                         |            |            |                 |                    |                   |           |                |            |           |            |            |                    |         |                         |       |                      |                           |                      |                         |                      |                         |                      |              |                     |                 |  |
| 20:80 CPN-SA 10% DOK   | 0.649                   | 0.878  | 0.921  | -24.2               | 295.0         | 0.116064378 | 50                      | 29.34      | 15385      | 61.77           | 0.4                | 7.6               | 2.4       | 0.10207143     | 0.14957429 | 0         | 0.03714286 | 0.14957429 | 444.43             | 201     | 630                     | -0.02 | -2.2                 | 7.75                      | -1                   | 9                       | 6                    | 181.62                  | 2                    | 113.89       | 42.88               | 4               |  |
| 20:80 CPN-SA 10% DOK   | 0.651                   | 0.878  | 0.928  | -19.9               | 290.0         | 0.09449098  | 50                      | 29.34      | 15385      | 61.77           | 0.4                | 7.6               | 2.4       | 0.10207143     | 0.14957429 | 0         | 0.03714286 | 0.14957429 | 444.43             | 201     | 630                     | -0.02 | -2.2                 | 7.75                      | -1                   | 9                       | 6                    | 181.62                  | 2                    | 113.89       | 42.88               | 4               |  |
| 20:80 CPTEG-CPN 1% DOK | 0.663                   | 0.810  | 0.816  | 16.1                | 187.0         | 0.130911331 | 45                      | 16.69      | 5902       | 17.81           | 2.4                | 6.0               | 12.0      | 0.10207143     | 0.14957429 | 0         | 0.03714286 | 0.14957429 | 444.43             | 201     | 630                     | -0.02 | -2.2                 | 7.75                      | -1                   | 9                       | 6                    | 181.62                  | 2                    | 113.89       | 42.88               | 4               |  |
| 20:80 CPTEG-CPN 1% DOK | 0.539                   | 0.861  | 0.871  | 10.8                | 198.0         | 0.09410899  | 45                      | 16.69      | 5902       | 17.81           | 2.4                | 6.0               | 12.0      | 0.10207143     | 0.14957429 | 0         | 0.03714286 | 0.14957429 | 444.43             | 201     | 630                     | -0.02 | -2.2                 | 7.75                      | -1                   | 9                       | 6                    | 181.62                  | 2                    | 113.89       | 42.88               | 4               |  |
| 20:80 CPN-SA 1% DOK    | 0.693                   | 0.821  | 0.882  | -24.2               | 295.0         | 0.116064378 | 50                      | 29.34      | 15385      | 61.77           | 0.4                | 7.6               | 2.4       | 0.10207143     | 0.14957429 | 0         | 0.03714286 | 0.14957429 | 444.43             | 201     | 630                     | -0.02 | -2.2                 | 7.75                      | -1                   | 9                       | 6                    | 181.62                  | 2                    | 113.89       | 42.88               | 4               |  |
| 20:80 CPN-SA 1% DOK    | 0.549                   | 0.870  | 0.926  | -19.9               | 290.0         | 0.09449098  | 50                      | 29.34      | 15385      | 61.77           | 0.4                | 7.6               | 2.4       | 0.10207143     | 0.14957429 | 0         | 0.03714286 | 0.14957429 | 444.43             | 201     | 630                     | -0.02 | -2.2                 | 7.75                      | -1                   | 9                       | 6                    | 181.62                  | 2                    | 113.89       | 42.88               | 4               |  |
| 20:80 CPTEG-CPN 1% DOK | 0.589                   | 0.752  | 0.778  | -14                 | 188.0         | 0.131660151 | 45                      | 16.69      | 5902       | 17.81           | 2.4                | 6.0               | 12.0      | 0.10207143     | 0.14957429 | 0         | 0.03714286 | 0.14957429 | 444.43             | 201     | 630                     | -0.02 | -2.2                 | 7.75                      | -1                   | 9                       | 6                    | 181.62                  | 2                    | 113.89       | 42.88               | 4               |  |
| 20:80 CPTEG-CPN 1% DOK | 0.615                   | 0.798  | 0.827  | -10.8               | 188.0         | 0.09410899  | 45                      | 16.69      | 5902       | 17.81           | 2.4                | 6.0               | 12.0      | 0.10207143     | 0.14957429 | 0         | 0.03714286 | 0.14957429 | 444.43             | 201     | 630                     | -0.02 | -2.2                 | 7.75                      | -1                   | 9                       | 6                    | 181.62                  | 2                    | 113.89       | 42.88               | 4               |  |
| 20:80 CPN-SA 1% RIF    | 0.267                   | 0.351  | 0.689  | -21.2               | 326.8         | 0.12999324  | 50                      | 29.34      | 15385      | 61.77           | 0.4                | 7.6               | 2.4       | 0.10207143     | 0.14957429 | 0         | 0.03714286 | 0.14957429 | 444.43             | 201     | 630                     | -0.02 | -2.2                 | 7.75                      | -1                   | 9                       | 6                    | 181.62                  | 2                    | 113.89       | 42.88               | 4               |  |
| 20:80 CPTEG-CPN 1% RIF | 0.613                   | 0.622  | 0.762  | -31.4               | 183.1         | 0.12629299  | 45                      | 16.69      | 5902       | 17.81           | 2.4                | 6.0               | 12.0      | 0.10207143     | 0.14957429 | 0         | 0.03714286 | 0.14957429 | 444.43             | 201     | 630                     | -0.02 | -2.2                 | 7.75                      | -1                   | 9                       | 6                    | 181.62                  | 2                    | 113.89       | 42.88               | 4               |  |
| 20:80 CPN-SA 1% RIF    | 0.385                   | 0.315  | 0.721  | -21.2               | 326.8         | 0.12999324  | 50                      | 29.34      | 15385      | 61.77           | 0.4                | 7.6               | 2.4       | 0.10207143     | 0.14957429 | 0         | 0.03714286 | 0.14957429 | 444.43             | 201     | 630                     | -0.02 | -2.2                 | 7.75                      | -1                   | 9                       | 6                    | 181.62                  | 2                    | 113.89       | 42.88               | 4               |  |
| 20:80 CPTEG-CPN 1% RIF | 1.127                   | 0.665  | 0.855  | -13.9               | 164.8         | 0.10555559  | 45                      | 16.69      | 5902       | 17.81           | 2.4                | 6.0               | 12.0      | 0.10207143     | 0.14957429 | 0         | 0.03714286 | 0.14957429 | 444.43             | 201     | 630                     | -0.02 | -2.2                 | 7.75                      | -1                   | 9                       | 6                    | 181.62                  | 2                    | 113.89       | 42.88               | 4               |  |
| 20:80 CPN-SA 2% CAM    | 0.664                   | 0.866  | 0.907  | -28.8               | 330.1         | 0.09649671  | 50                      | 29.34      | 15385      | 61.77           | 0.4                | 7.6               | 2.4       | 0.10207143     | 0.14957429 | 0         | 0.03714286 | 0.14957429 | 444.43             | 201     | 630                     | -0.02 | -2.2                 | 7.75                      | -1                   | 9                       | 6                    | 181.62                  | 2                    | 113.89       | 42.88               | 4               |  |
| 20:80 CPTEG-CPN 2% CAM | 1.235                   | 0.766  | 0.782  | -36.5               | 177.8         | 0.108201732 | 45                      | 16.69      | 5902       | 17.81           | 2.4                | 6.0               | 12.0      | 0.10207143     | 0.14957429 | 0         | 0.03714286 | 0.14957429 | 444.43             | 201     | 630                     | -0.02 | -2.2                 | 7.75                      | -1                   | 9                       | 6                    | 181.62                  | 2                    | 113.89       | 42.88               | 4               |  |
| 20:80 CPTEG-CPN 2% CAM | 1.117                   | 0.821  | 0.838  | -36.5               | 177.8         | 0.108201732 | 45                      | 16.69      | 5902       | 17.81           | 2.4                | 6.0               | 12.0      | 0.10207143     | 0.14957429 | 0         | 0.03714286 | 0.14957429 | 444.43             | 201     | 630                     | -0.02 | -2.2                 | 7.75                      | -1                   | 9                       | 6                    | 181.62                  | 2                    | 113.89       | 42.88               | 4               |  |
| 20:80 CPN-SA 2% CAM    | 0.598                   | 0.886  | 0.927  | -28.8               | 330.1         | 0.09649671  | 50                      | 29.34      | 15385      | 61.77           | 0.4                | 7.6               | 2.4       | 0.10207143     | 0.14957429 | 0         | 0.03714286 | 0.14957429 | 444.43             | 201     | 630                     | -0.02 | -2.2                 | 7.75                      | -1                   | 9                       | 6                    | 181.62                  | 2                    | 113.89       | 42.88               | 4               |  |
| 20:80 CPN-SA 1% RIF    | 0.693                   | 0.171  | 0.276  | -21.5               | 282.8         | 0.119654883 | 50                      | 29.34      | 15385      | 61.77           | 0.4                | 7.6               | 2.4       | 0.10207143     | 0.14957429 | 0         | 0.03714286 | 0.14957429 | 444.43             | 201     | 630                     | -0.02 | -2.2                 | 7.75                      | -1                   | 9                       | 6                    | 181.62                  | 2                    | 113.89       | 42.88               | 4               |  |
| 20:80 CPTEG-CPN 1% RIF | 0.887                   | 0.057  | 0.086  | -24.1               | 216.8         | 0.10502057  | 45                      | 16.69      | 5902       | 17.81           | 2.4                | 6.0               | 12.0      | 0.10207143     | 0.14957429 | 0         | 0.03714286 | 0.14957429 | 444.43             | 201     | 630                     | -0.02 | -2.2                 | 7.75                      | -1                   | 9                       | 6                    | 181.62                  | 2                    | 113.89       | 42.88               | 4               |  |
| 20:80 CPN-SA 1% RIF    | 0.349                   | 0.299  | 0.440  | -31.8               | 317.7         | 0.094660937 | 50                      | 29.34      | 15385      | 61.77           | 0.4                | 7.6               | 2.4       | 0.10207143     | 0.14957429 | 0         | 0.03714286 | 0.14957429 | 444.43             | 201     | 630                     | -0.02 | -2.2                 | 7.75                      | -1                   | 9                       | 6                    | 181.62                  | 2                    | 113.89       | 42.88               | 4               |  |
| 20:80 CPTEG-CPN 1% RIF | 1.169                   | 0.268  | 0.313  | -31.1               | 181.5         | 0.132033948 | 45                      | 16.69      | 5902       | 17.81           | 2.4                | 6.0               | 12.0      | 0.10207143     | 0.14957429 | 0         | 0.03714286 | 0.14957429 | 444.43             | 201     | 630                     | -0.02 | -2.2                 | 7.75                      | -1                   | 9                       | 6                    | 181.62                  | 2                    | 113.89       | 42.88               | 4               |  |
| 20:80 CPN-SA 1% DOK    | 0.640                   | 0.841  | 0.854  | -16.4               | 300.1         | 0.142181554 | 50                      | 29.34      | 15385      | 61.77           | 0.4                | 7.6               | 2.4       | 0.10207143     | 0.14957429 | 0         | 0.03714286 | 0.14957429 | 444.43             | 201     | 630                     | -0.02 | -2.2                 | 7.75                      | -1                   | 9                       | 6                    | 181.62                  | 2                    | 113.89       | 42.88               | 4               |  |
| 20:80 CPN-SA 1% DOK    | 0.516                   | 0.875  | 0.885  | -10.4               | 202.1         | 0.135978788 | 50                      | 29.34      | 15385      | 61.77           | 0.4                | 7.6               | 2.4       | 0.10207143     | 0.14957429 | 0         | 0.03714286 | 0.14957429 | 444.43             | 201     | 630                     | -0.02 | -2.2                 | 7.75                      | -1                   | 9                       | 6                    | 181.62                  | 2                    | 113.89       | 42.88               | 4               |  |
| 20:80 CPN-SA 1% DOK    | 0.656                   | 0.785  | 0.822  | -7.46               | 329.0         | 0.133939982 | 50                      | 29.34      | 15385      | 61.77           | 0.4                | 7.6               | 2.4       | 0.10207143     | 0.14957429 | 0         | 0.03714286 | 0.14957429 | 444.43             | 201     | 630                     | -0.02 | -2.2                 | 7.75                      | -1                   | 9                       | 6                    | 181.62                  | 2                    | 113.89       | 42.88               | 4               |  |
| 20:80 CPN-SA 1% DOK    | 0.686                   | 0.821  | 0.860  | -19.3               | 352.0         | 0.144810296 | 50                      | 29.34      | 15385      | 61.77           | 0.4                | 7.6               | 2.4       | 0.10207143     | 0.14957429 | 0         | 0.03714286 | 0.14957429 | 444.43             | 201     | 630                     | -0.02 | -2.2                 | 7.75                      | -1                   | 9                       | 6                    | 181.62                  | 2                    | 113.89       | 42.88               | 4               |  |
| 20:80 CPN-SA 1% DOK    | 0.768                   | 0.827  | 0.855  | -16.7               | 342.1         | 0.144132512 | 50                      | 29.34      | 15385      | 61.77           | 0.4                | 7.6               | 2.4       | 0.10207143     | 0.14957429 | 0         | 0.03714286 | 0.14957429 | 444.43             | 201     | 630                     | -0.02 | -2.2                 | 7.75                      | -1                   | 9                       | 6                    | 181.62                  | 2                    | 113.89       | 42.88               | 4               |  |
| 20:80 CPN-SA 1% DOK    | 0.895                   | 0.865  | 0.882  | -20.1               | 346.8         | 0.144335858 | 50                      | 29.34      | 15385      | 61.77           | 0.4                | 7.6               | 2.4       | 0.10207143     | 0.14957429 | 0         | 0.03714286 | 0.14957429 | 444.43             | 201     | 630                     | -0.02 | -2.2                 | 7.75                      | -1                   | 9                       | 6                    | 181.62                  | 2                    | 113.89       | 42.88               | 4               |  |
| 20:80 CPN-SA 1% DOK    | 0.876                   | 0.763  | 0.795  | -13.6               | 337.7         | 0.156202331 | 50                      | 29.34      | 15385      | 61.77           | 0.4                | 7.6               | 2.4       | 0.10207143     | 0.14957429 | 0         | 0.03714286 | 0.14957429 | 444.43             | 201     | 630                     | -0.02 | -2.2                 | 7.75                      | -1                   | 9                       | 6                    | 181.62                  | 2                    | 113.89       | 42.88               | 4               |  |
| 20:80 CPN-SA 1% DOK    | 1.074                   | 0.781  | 0.807  | -17                 | 344.8         | 0.143938982 | 50                      | 29.34      | 15385      | 61.77           | 0.4                | 7.6               | 2.4       | 0.10207143     | 0.14957429 | 0         | 0.03714286 | 0.14957429 | 444.43             | 201     | 630                     | -0.02 | -2.2                 | 7.75                      | -1                   | 9                       | 6                    | 181.62                  | 2                    | 113.89       | 42.88               | 4               |  |
| 20:80 CPN-SA 1% DOK    | 1.305                   | 0.764  | 0.792  | -18.9               | 342.8         | 0.144481171 | 50                      | 29.34      | 15385      | 61.77           | 0.4                | 7.6               | 2.4       | 0.10207143     | 0.14957429 | 0         | 0.03714286 | 0.14957429 | 444.43             | 201     | 630                     | -0.02 | -2.2                 | 7.75                      | -1                   | 9                       | 6                    | 181.62                  | 2                    | 113.89       | 42.88               | 4               |  |
| 20:80 CPN-SA 1% DOK    | 1.590                   | 0.675  | 0.702  | -7.96               | 324.5         | 0.143488973 | 50                      | 29.34      | 15385      | 61.77           | 0.4                | 7.6               | 2.4       | 0.10207143     | 0.14957429 | 0         | 0.03714286 | 0.14957429 | 444.43             | 201     | 630                     | -0.02 | -2.2                 | 7.75                      | -1                   | 9                       | 6                    | 181.62                  | 2                    | 113.89       | 42.88               | 4               |  |
| 20:80 CPTEG-CPN 1% DOK | 0.574                   | 0.799  | 0.806  | -8.24               | 188.8         | 0.08922654  | 45                      | 17.71      | 6230       | 42.35           | 2.4                | 6.0               | 12.0      | 0.10207143     | 0.14957429 | 0         | 0.03714286 | 0.14957429 | 444.43             | 201     | 630                     | -0.02 | -2.2                 | 7.75                      | -1                   | 9                       | 6                    | 181.62                  | 2                    | 113.89       | 42.88               | 4               |  |
| 20:80 CPTEG-CPN 1% DOK | 0.647                   | 0.836  | 0.800  | -2.23               | 175.8         | 0.116575724 | 45                      | 17.71      | 6230       | 42.35           | 2.4                | 6.0               | 12.0      | 0.10207143     | 0.14957429 | 0         | 0.03714286 | 0.14957429 | 444.43             | 201     | 630                     | -0.02 | -2.2                 | 7.75                      | -1                   | 9                       | 6                    | 181.62                  | 2                    | 113.89       | 42.88               | 4               |  |
| 20:80 CPTEG-CPN 1% DOK | 0.688                   | 0.821  | 0.878  | -6.01               | 163.8         | 0.101799071 | 45                      | 17.71      | 6230       | 42.35           | 2.4                | 6.0               | 12.0      | 0.10207143     | 0.14957429 | 0         | 0.03714286 | 0.14957429 | 444.43             | 201     | 630                     | -0.02 | -2.2                 | 7.75                      | -1                   | 9                       | 6                    | 181.62                  | 2                    | 113.89       | 42.88               | 4               |  |
| 20:80 CPTEG-CPN 1% DOK | 0.662                   | 0.760  | 0.831  | -6.12               | 165.0         | 0.102046078 | 45                      | 17.71      | 6230       | 42.35           | 2.4                | 6.0               | 12.0      | 0.10207143     | 0.14957429 |           |            |            |                    |         |                         |       |                      |                           |                      |                         |                      |                         |                      |              |                     |                 |  |

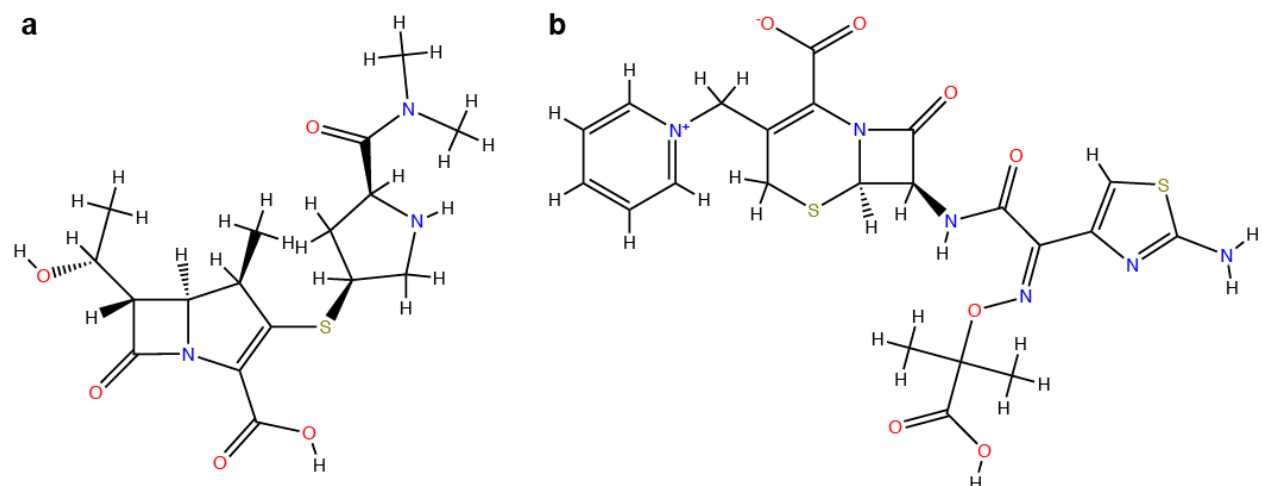

**Figure S4.** Chemical structures of antibiotics in model validation data set. Meropenem (MEM, a) and ceftazidime (CAZ, b) both contain sulfur atoms, which were not included in training data set.

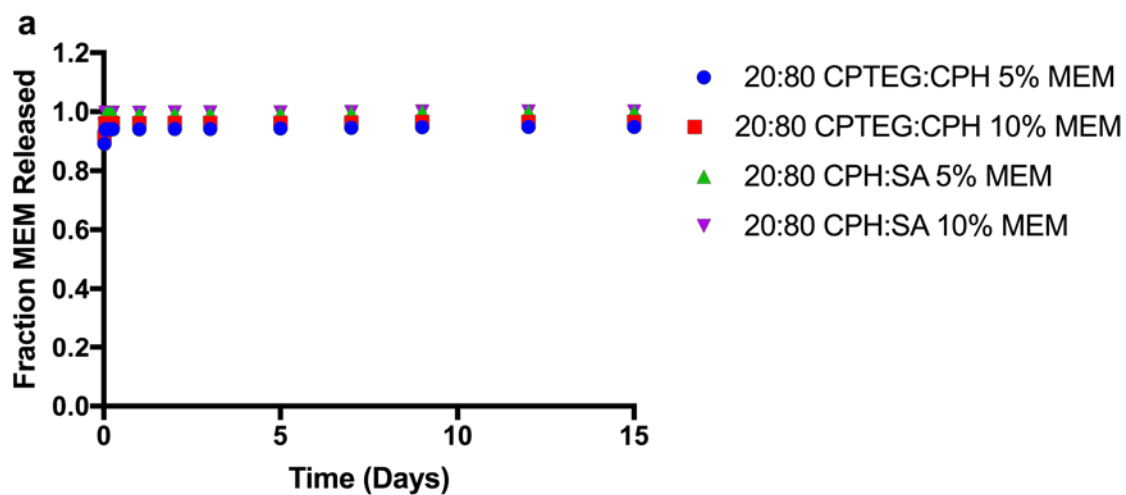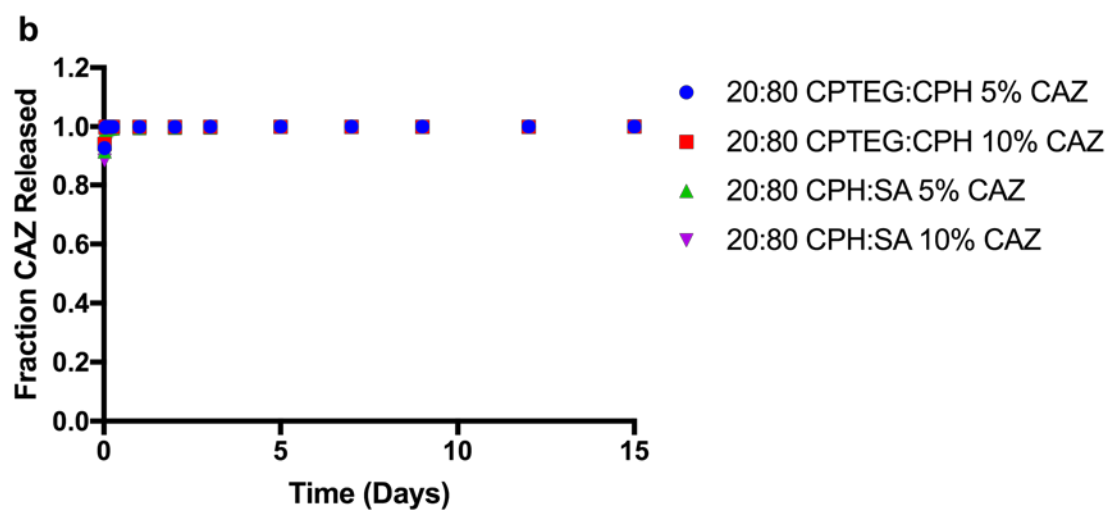

**Figure S5.** Release kinetics from nanoparticles encapsulating drugs not included in training data set. All formulations showed an extensive burst. Release property parameterization is shown in Table 3. Drug abbreviations: meropenem (MEM); ceftazidime (CAZ).
